# Supplementary material for: The acoustic quality and health in urban environments (SALVE) project: Study design, rationale and methodology
Source: bioRxiv or medRxiv preprint supplement (doi:10.1101/2021.02.23.21252275), 2021-02-24

## B Appendix: Additional information on AAP recordings

### B.1: Target LU and measured LU of the AAP<sub>24</sub>

| Device ID | Target LU                                                                                                         | Target LU (Code) | Measured LU                                                     | Measured LU (Code) | Distance to target LU in meter |
|-----------|-------------------------------------------------------------------------------------------------------------------|------------------|-----------------------------------------------------------------|--------------------|--------------------------------|
| 1         | Residential areas, up to 3 floors                                                                                 | 10               | Small gardens / open spaces in residential and mixed use areas  | 291                | < 5                            |
| 2         | Residential areas, up to 3 floors                                                                                 | 10               | Small gardens / open spaces in residential and mixed use areas  | 291                | < 5                            |
| 3         | Residential areas, up to 3 floors                                                                                 | 10               | Residential areas, up to 3 floors                               | 10                 | 0                              |
| 4         | Residential areas, up to 5 floors                                                                                 | 20               | Informal neighbourhood green spaces                             | 273                | 5                              |
| 5         | Residential areas, up to 5 floors                                                                                 | 20               | Tree groups and tree rows                                       | 432                | 17                             |
| 6         | Residential areas, up to 5 floors                                                                                 | 20               | Roadside vegetation and tree alley                              | 321                | 15                             |
| 7         | Residential areas, over 5 floors                                                                                  | 30               | Garage yards in residential and mixed use areas                 | 174                | 10                             |
| 8         | Residential areas, over 5 floors                                                                                  | 30               | Informal neighbourhood green spaces                             | 273                | 10                             |
| 9         | Residential areas, over 5 floors                                                                                  | 30               | Designed neighbourhood parks in residential and mixed use areas | 271                | 28                             |
| 10        | Public and institutional facilities (kindergartens, after-school care, youth and elderly homes / housing estates) | 84               | Residential and access roads                                    | 151                | < 5                            |
| 11        | Public and institutional facilities (kindergartens, after-school care, youth and elderly homes / housing estates) | 84               | Residential and access roads                                    | 151                | 30                             |
| 12        | Public and institutional facilities (kindergartens, after-school care, youth and elderly homes / housing estates) | 84               | Informal neighbourhood green spaces                             | 273                | 8                              |
| 13        | Commercial area (facilities / residential areas)                                                                  | 51               | Informal neighbourhood green spaces                             | 273                | 20                             |
| 14        | Commercial area (facilities / residential areas)                                                                  | 51               | Commercial area (facilities / residential areas)                | 51                 | 0                              |
| 15        | Commercial area (facilities / residential areas)                                                                  | 51               | Residential and access roads                                    | 151                | 6                              |
| 16        | Designed neighborhood parks in residential and mixed use areas                                                    | 271              | Sports and play facilities                                      | 308                | < 5                            |
| 17        | Agricultural land with homesteads (buildings and facilities)                                                      | 91               | Mixed forest                                                    | 420                | 108                            |
| 18        | Agricultural land with homesteads (buildings and facilities)                                                      | 91               | Small gardens / open spaces in residential and mixed use areas  | 291                | < 5                            |
| 19        | Agricultural land with homesteads (buildings and facilities)                                                      | 91               | Agricultural land with homesteads (buildings and facilities)    | 91                 | 0                              |
| 20        | Deciduous forest                                                                                                  | 400              | Deciduous forest                                                | 400                | 0                              |
| 21        | Commercial mixed use                                                                                              | 40               | Small gardens / open spaces in residential and mixed use areas  | 291                | < 5                            |
| 22        | Commercial mixed use                                                                                              | 40               | Residential and access roads                                    | 151                | 40                             |
| 23        | Commercial mixed use                                                                                              | 40               | Residential and access roads                                    | 151                | < 5                            |
| 24        | Mixed forest                                                                                                      | 420              | Mixed forest                                                    | 420                | 0                              |

*Distance < 5 is used, when the device was placed upon trees on the edge of the target LU-Area.*

## B.2: Target LU and measured LU of the AAP<sub>4</sub>

| Device ID | Target LU                                                                                                         | Target LU (Code) | Measured LU                                                                                  | Measured LU (Code) | BP  |
|-----------|-------------------------------------------------------------------------------------------------------------------|------------------|----------------------------------------------------------------------------------------------|--------------------|-----|
| 25        | Commercial mixed use                                                                                              | 40               | Informal neighbourhood green spaces                                                          | 273                | Yes |
| 26        | Residential areas, up to 5 floors                                                                                 | 20               | Parking spaces                                                                               | 171                | Yes |
| 27        | Designed neighborhood parks in residential and mixed use areas                                                    | 271              | Major roads and main roads                                                                   | 140                | Yes |
| 28        | Residential areas, up to 3 floors                                                                                 | 10               | Woods                                                                                        | 451                | Yes |
| 25        | Public and institutional facilities (kindergartens, after-school care, youth and elderly homes / housing estates) | 84               | Other paths / roads                                                                          | 152                | No  |
| 26        | Agricultural land with homesteads (buildings and facilities)                                                      | 91               | Woods                                                                                        | 431                | Yes |
| 27        | Commercial area (facilities / residential areas)                                                                  | 51               | Commercial area (open / reserve areas)                                                       | 53                 | Yes |
| 28        | Residential areas, over 5 floors                                                                                  | 30               | Public and institutional facilities (churches and parish halls, monasteries)                 | 85                 | Yes |
| 25        | Designed neighborhood parks in residential and mixed use areas                                                    | 271              | Residential areas, up to 3 floors                                                            | 10                 | Yes |
| 26        | Residential areas, up to 3 floors                                                                                 | 10               | Residential and access roads                                                                 | 151                | Yes |
| 27        | Commercial mixed use                                                                                              | 40               | Residential and access roads                                                                 | 151                | Yes |
| 28        | Residential areas, up to 5 floors                                                                                 | 20               | Public and institutional facilities (public and private educational institutions, libraries) | 83                 | Yes |
| 25        | Public and institutional facilities (kindergartens, after-school care, youth and elderly homes / housing estates) | 84               | Roadside vegetation and tree alley                                                           | 321                | Yes |
| 26        | Agricultural land with homesteads (buildings and facilities)                                                      | 91               | Roadside vegetation and tree alley                                                           | 321                | Yes |
| 27        | Residential areas, over 5 floors                                                                                  | 30               | Cemeteries                                                                                   | 282                | Yes |
| 28        | Commercial area (facilities / residential areas)                                                                  | 51               | Parking spaces                                                                               | 171                | Yes |
| 25        | Residential areas, up to 3 floors                                                                                 | 10               | Residential areas, up to 3 floors                                                            | 10                 | No  |
| 26        | Designed neighborhood parks in residential and mixed use areas                                                    | 271              | Residential areas, up to 5 floors                                                            | 20                 | No  |
| 27        | Commercial mixed use                                                                                              | 40               | Parking spaces                                                                               | 171                | No  |
| 28        | Residential areas, up to 5 floors                                                                                 | 20               | Commercial mixed use                                                                         | 40                 | No  |
| 25        | Public and institutional facilities (kindergartens, after-school care, youth and elderly homes / housing estates) | 84               | Residential and access roads                                                                 | 151                | Yes |
| 26        | Agricultural land with homesteads (buildings and facilities)                                                      | 91               | Woods                                                                                        | 431                | Yes |
| 27        | Residential areas, over 5 floors                                                                                  | 30               | Parks and gardens (municipal parks, botanical gardens, zoo)                                  | 272                | Yes |
| 28        | Commercial area (facilities / residential areas)                                                                  | 51               | Roadside vegetation and tree alley                                                           | 321                | Yes |
| 25        | Agricultural land with homesteads (buildings and facilities)                                                      | 91               | Informal neighbourhood green spaces                                                          | 273                | Yes |
| 26        | Residential areas, over 5 floors                                                                                  | 30               | Major roads and main roads                                                                   | 140                | Yes |
| 27        | Commercial area (facilities / residential areas)                                                                  | 51               | Informal neighbourhood green spaces                                                          | 273                | Yes |
| 28        | Public and institutional facilities (kindergartens, after-school care, youth and elderly homes / housing estates) | 84               | Major roads and main roads                                                                   | 140                | Yes |

### B.3: Recording period for all AAP<sub>24</sub>

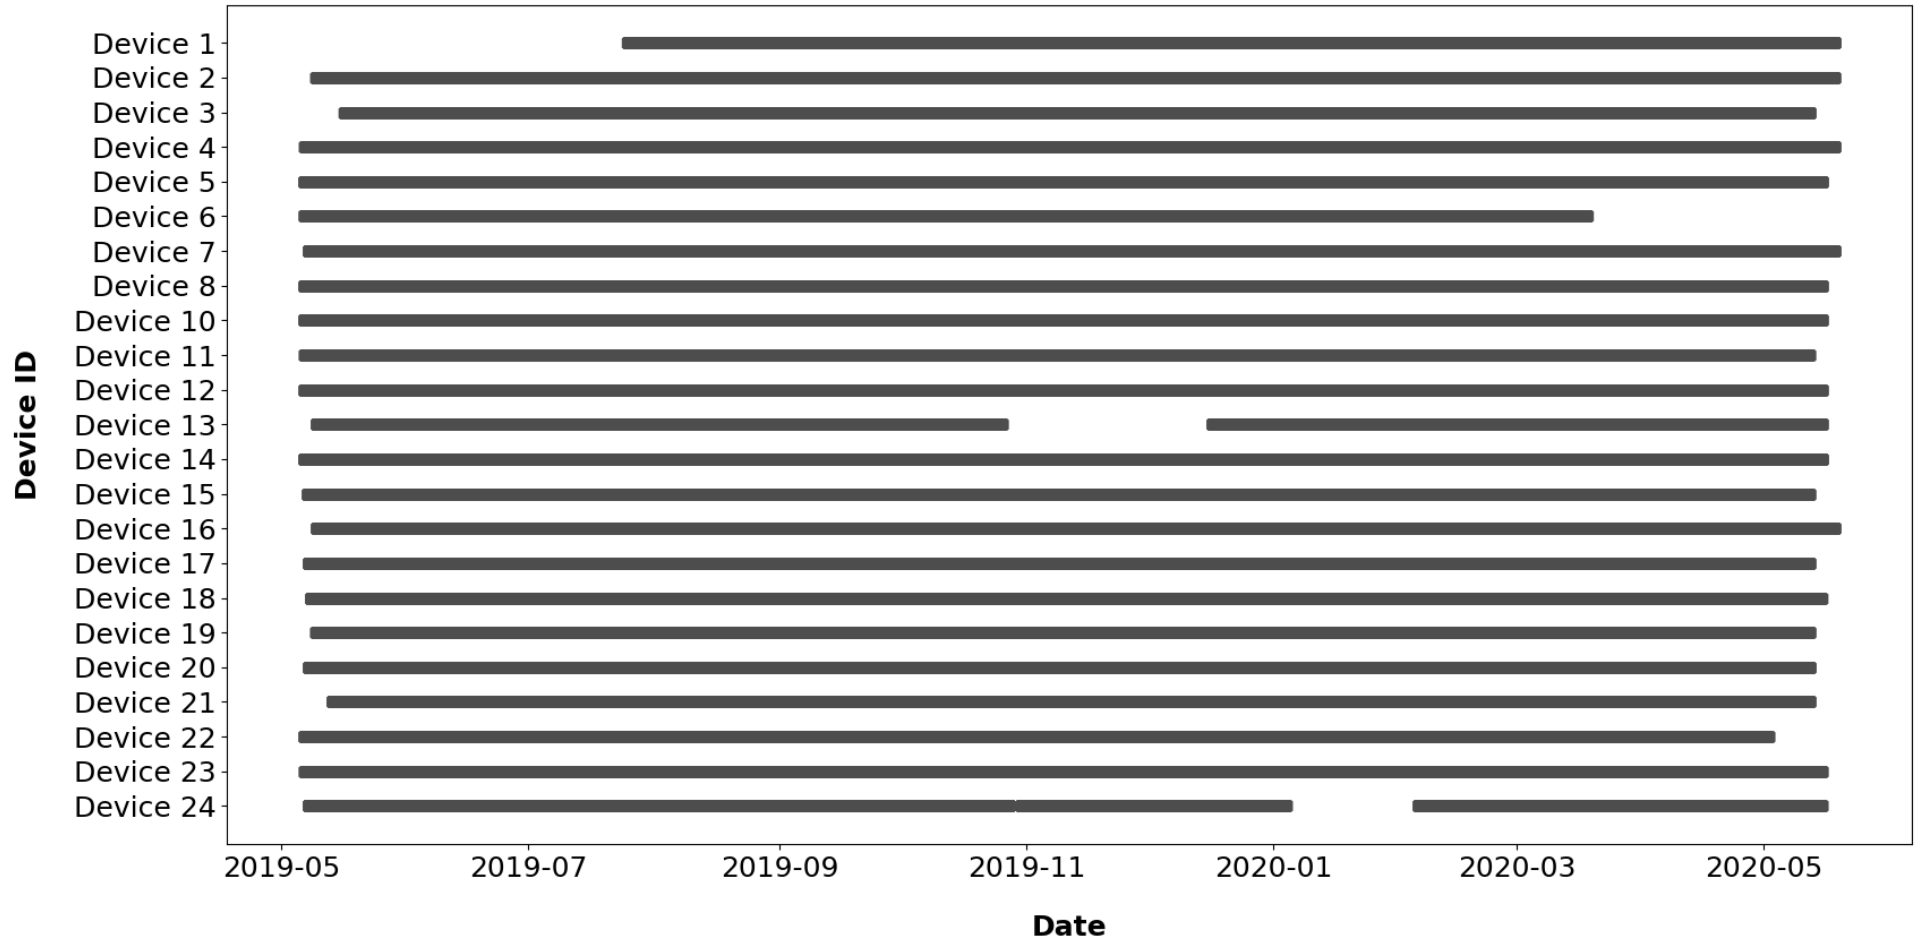

Supplement: Supplementary file [file media-2.pdf]
