# Supplementary material for: The acoustic quality and health in urban environments (SALVE) project: Study design, rationale and methodology
Source: bioRxiv or medRxiv preprint supplement (doi:10.1101/2021.02.23.21252275), 2021-02-24
Supplement: Supplementary file [file media-1.pdf]

## A Appendix: Additional information on DAP recordings

### A.1: Summary of DAP-Recordings by LU-Category (n)

| LU (Code) | Measured LU-Category                                                                                              | Spring     | Summer     | Fall       | Winter     | Total        |
|-----------|-------------------------------------------------------------------------------------------------------------------|------------|------------|------------|------------|--------------|
| 10        | Residential areas, up to 3 floors                                                                                 | 57         | 80         | 91         | 89         | 317          |
| 20        | Residential areas, up to 5 floors                                                                                 | 59         | 69         | 81         | 82         | 291          |
| 30        | Residential areas, over 5 floors                                                                                  | 31         | 53         | 54         | 55         | 193          |
| 40        | Commercial mixed use                                                                                              | 49         | 63         | 68         | 74         | 254          |
| 51        | Commercial area (facilities / residential areas)                                                                  | 31         | 51         | 55         | 59         | 196          |
| 52        | Commercial area (storage spaces)                                                                                  | 7          | 9          | 12         | 11         | 39           |
| 53        | Commercial area (open / reserve areas)                                                                            | 1          | 1          | 1          | 1          | 4            |
| 54        | Commercial area (parking space)                                                                                   | 2          | 5          | 6          | 6          | 19           |
| 84        | Public and institutional facilities (kindergartens, after-school care, youth and elderly homes / housing estates) | 29         | 44         | 54         | 50         | 177          |
| 85        | Public and institutional facilities (churches and parish halls, monasteries)                                      | 0          | 2          | 0          | 2          | 4            |
| 86        | Public and institutional facilities (police, fire department, rescue stations, bunkers)                           | 0          | 1          | 1          | 1          | 3            |
| 91        | Agricultural land with homesteads (buildings and facilities)                                                      | 23         | 29         | 32         | 33         | 117          |
| 93        | Agricultural land with homesteads (other areas)                                                                   | 0          | 1          | 1          | 1          | 3            |
| 140       | Major roads and main roads                                                                                        | 8          | 3          | 8          | 7          | 26           |
| 151       | Residential and access roads                                                                                      | 22         | 29         | 34         | 34         | 119          |
| 152       | Other paths / roads                                                                                               | 1          | 2          | 2          | 2          | 7            |
| 160       | Pedestrian zones                                                                                                  | 1          | 1          | 1          | 1          | 4            |
| 171       | Parking spaces                                                                                                    | 2          | 4          | 4          | 4          | 14           |
| 172       | Parking garages                                                                                                   | 1          | 1          | 1          | 1          | 4            |
| 174       | Garage yards in residential and mixed use areas                                                                   | 2          | 2          | 4          | 4          | 12           |
| 271       | Designed neighbourhood parks in residential and mixed use areas                                                   | 46         | 59         | 73         | 74         | 252          |
| 272       | Parks and gardens (municipal parks, botanical gardens, zoo)                                                       | 1          | 1          | 1          | 1          | 4            |
| 273       | Informal neighbourhood green spaces                                                                               | 4          | 3          | 5          | 5          | 17           |
| 291       | Small gardens / open spaces in residential and mixed use areas                                                    | 1          | 2          | 2          | 2          | 7            |
| 321       | Roadside vegetation and tree alley                                                                                | 2          | 3          | 3          | 3          | 11           |
| 361       | Meadows and pastures                                                                                              | 6          | 5          | 6          | 6          | 23           |
| 370       | Farmland                                                                                                          | 1          | 3          | 3          | 3          | 10           |
| 400       | Deciduous forest                                                                                                  | 39         | 45         | 54         | 52         | 190          |
| 410       | Coniferous forest                                                                                                 | 1          | 1          | 1          | 1          | 4            |
| 420       | Mixed forest                                                                                                      | 23         | 26         | 24         | 26         | 99           |
| 431       | Woods                                                                                                             | 3          | 3          | 3          | 4          | 13           |
|           | <b>Total</b>                                                                                                      | <b>453</b> | <b>601</b> | <b>685</b> | <b>694</b> | <b>2,433</b> |

### A.2: Summary of DAP-Recordings by working day

| <b>Working day</b> | <b>n</b>     |
|--------------------|--------------|
| Monday             | 322          |
| Tuesday            | 337          |
| Wednesday          | 834          |
| Thursday           | 636          |
| Friday             | 304          |
| <b>Total</b>       | <b>2,433</b> |

### A.3: Summary of DAP-Recordings by hour of day

| <b>Time period</b> | <b>n</b>     |
|--------------------|--------------|
| 09:00 - 10:00      | 137          |
| 10:00 - 11:00      | 377          |
| 11:00 - 12:00      | 480          |
| 12:00 - 13:00      | 475          |
| 13:00 - 14:00      | 390          |
| 14:00 - 15:00      | 291          |
| 15:00 - 16:00      | 192          |
| 16:00 - 17:00      | 91           |
| <b>Total</b>       | <b>2,429</b> |
